# Supplementary material for: Proteogenomic characterization of cervical cancer identifies molecular subtypes predictive of clinical outcomes and subtype-specific targets
Source: JCI journal article supplement (doi:10.1172/jci199497), 2026-02-10
Supplement: sd1 [file 1]

## Supplemental materials

### 1 Supplemental Notes

#### 2 Supplemental Note 1. Mutation signatures in CC.

3 Mutational signatures analysis identified three patterns in CC. SBS96A, prevalent in  
4 47% of cases, best resembled Catalogue of Somatic Mutations in Cancer (COSMIC)  
5 signature 2/13 (APOBEC-related) (1) with a cosine similarity of 0.984. SBS96C,  
6 observed in 51% of samples, aligned with COSMIC signature 5 (aging-related) with a  
7 cosine similarity of 0.940. SBS96B, present in 2% of cases, resembled COSMIC  
8 signature 33 (unknown etiology) with a cosine similarity of 0.989 (Supplemental Figure  
9 1, A and B). Consistent with previous reports (2), HPV+ tumors exhibited a  
10 significantly higher APOBEC-associated mutational burden compared to HPV- tumors  
11 ( $P = 0.002$ , Fisher's exact test; Supplemental Figure 1C).

12

#### 13 Supplemental Note 2. Identification of potential therapeutic targets in CC based 14 on protein overexpression profiles.

15 Among the 23 proteins with more than a 1.5 log<sub>2</sub> fold change in at least 90% of tumors  
16 (Supplemental Figure 3C), TACSTD2, which is overexpressed in various solid tumors,  
17 is a well-established target of ADC with promising clinical efficacy in cancers including  
18 triple negative breast cancer, small cell lung cancer, and colorectal cancer (3).  
19 Additionally, TFRC and TYMP are targeted by FDA-approved drugs. Multiple  
20 components of the MCM complex, including MCM2/3/5/6/7, which are crucial for

21 DNA replication initiation, were also significantly upregulated (4-7). Their  
22 overexpression has been associated with poor prognosis in hepatocellular carcinoma  
23 and gastric cancer (5-7). These proteins represent valuable candidate therapeutic targets  
24 for CC.

25

26 **Supplemental Note 3. Impacts of *SCAMP3* gain on protein expression and tumor**  
27 **growth.**

28 In tumor samples carrying *SCAMP3* gain, both mRNA and protein expression were  
29 concordantly elevated (Supplemental Figure 6, A and B). Experimental assays showed  
30 that knockout of *SCAMP3* in SiHa and HeLa cells markedly suppressed colony  
31 formation (Supplemental Figure 6, C–F) and attenuated tumor growth in xenograft  
32 models (Supplemental Figure 6, G and H). Mechanistic investigation showed that  
33 *SCAMP3* depletion reduced growth factor receptor (EGFR) stability and attenuated  
34 AKT signaling (Supplemental Figure 6J), indicating that *SCAMP3* supports  
35 proliferation by potentiating EGFR signaling. Clinically, high *SCAMP3* levels were  
36 significantly associated with reduced OS (HR = 2.464,  $P = 0.02$ , Log-rank test), and  
37 showed a trend toward poorer PFS (HR = 1.803,  $P = 0.08$ , Log-rank test; Supplemental  
38 Figure 6I and Supplemental Table 3).

39

40 **Supplemental Note 4. The expression patterns of representative genes to refine the**  
41 **biological identity of each subtype.**

42 Subtype C1 displayed pronounced upregulation of canonical EMT-related  
43 transcriptional factors including *TWIST1/2*, *SNAIL*, and *ZEB1/2* (8) (adjusted P value <  
44 0.01, ANOVA test; Supplemental Figure 8). Subtype C2 showed high levels of  
45 proliferation markers including TOP2A (9), PCNA (10), and MKI67 (adjusted P value  
46 < 0.01, ANOVA test; Supplemental Figure 8). Subtype C3 demonstrated elevated  
47 expression of immune stimulators such as *IL2RA*, *CD27*, *CXCL10*, *CD28*, *TNFRSF4*,  
48 and *TNFRSF18* (11) (adjusted P value < 0.01, ANOVA test; Supplemental Figure 8).  
49 Lastly, subtype C4 was enriched for keratin-related epithelial markers, including  
50 KRT16, KRT6A, KRT6B, KRT6C, KRT5, KRT15, SFN, and KRT14 (adjusted P value  
51 < 0.01, ANOVA test; Supplemental Figure 8).

52

53 **Supplemental Note 5. Correlation of CC molecular subtypes with TCGA RPPA**  
54 **clusters.**

55 We constructed an XGBoost classifier using the overlapping mRNA and protein  
56 features shared between our in-house cohort and the TCGA-CESC dataset. To derive  
57 an optimal and robust model architecture, we incorporated grid search and stratified  
58 cross-validation during the training phase, alongside an independent validation process  
59 in the testing phase. This optimized classifier was subsequently applied to TCGA-  
60 CESC samples for subtype stratification, where each case was assigned to one of the  
61 four predefined subtypes (C1–C4). Our classification system showed substantial  
62 concordance with previously established TCGA subtypes (Supplemental Figure 9 A–  
63 E). Specifically, our C1 (EMT-high) subtype aligned with the TCGA keratin-

64 low/RPPA–EMT cluster, while our C4 subtype corresponded to the TCGA keratin-  
65 high/RPPA–PI3K–AKT cluster. These alignments validated the biological relevance of  
66 our classification framework.

67 Beyond these concordant findings, our analysis also revealed novel insights not  
68 captured by the original TCGA classification. The C2 subtype, characterized by  
69 proliferative activity and immune-cold features, showed the strongest alignment with  
70 the TCGA “Hormone” cluster (13/19 cases, 68%), with the remaining cases distributed  
71 across the TCGA EMT (3 cases, 16%) and PI3K-AKT (3 cases, 16%) clusters.  
72 Furthermore, we identified a distinct C3 immune-hot subtype with favorable prognosis  
73 that was not explicitly defined in the original TCGA classification.

74

#### 75 **Supplemental Note 6. Identification of subtype-specific cell lines.**

76 To validate our proposed subtype-specific therapeutic strategies, we analyzed RNA-seq  
77 data from four cervical cancer cell lines (S12, SiHa, Ca Ski and ME-180), focusing on  
78 gene expression patterns representative of the four molecular subtypes. The results  
79 revealed distinct subtype-specific profiles: S12 cells showed elevated expression of  
80 EMT-associated transcription factors, aligning with the C1 subtype (Figure 5A). SiHa  
81 cells demonstrated overexpression of cell cycle regulation genes, corresponding to the  
82 C2 subtype (Figure 5A). Ca Ski cells exhibited high expression of immune-related  
83 genes, indicative of the C3 subtype, while ME-180 cells demonstrated marked  
84 overexpression of keratin proteins, placing them in the C4 subtype (Figure 5A).

85

86 **Supplemental Note 7. Uncovering subtype-specific genetic vulnerabilities through**  
87 **DepMap essentiality profiling.**

88 To elucidate the functions of subtype-specific genes, we assessed the genetic  
89 vulnerabilities of proteins and mRNA uniquely expressed in each subtype, using data  
90 from the DepMap project (<https://depmap.org/>). We calculated the average gene  
91 essentiality scores, which indicate tumor cell survival dependencies, across 15 CC cell  
92 lines after the knockout of 1,188 genes encoding subtype-specific proteins. Essential  
93 proteins were defined as those with gene essentiality scores below -0.7. Notably, 23.67%  
94 (98/414) of proteins in the C2 subtype were essential, compared to just 1.30% (6/462)  
95 in C1, 1.35% (1/74) in C3, and 8.8% (21/238) in C4 (Figure 5E). The high proportion  
96 of essential proteins in C2 suggests a critical survival advantage for tumor cells in this  
97 subtype, which may contribute to its poorer prognosis.

98

99 **Supplemental Note 8. Human-HPV fusion transcripts and fusion peptides,**  
100 **stratified by HPV type.**

101 As shown in Supplemental Table 7B and Supplemental Figure 16, A and B, we  
102 identified a total of 151 human-viral fusion transcripts. Of these, 87 (57.6%) were  
103 derived from HPV16, and 15 (9.9%) were from HPV18. Integration sites differed  
104 between HPV16 and HPV18. The majority of breakpoints in the viral genome were  
105 mapped to the early genomic regions in both HPV types. Integration breakpoints  
106 distributions differed between HPV16 and HPV18. In both HPV types, most viral  
107 breakpoints were located in the early genomic region. Specifically, E1 harbored the

108 highest proportion of breakpoints (HPV16: 57/87, 65.5%; HPV18: 10/15, 66.7%),  
109 followed by E2 (HPV16: 18/87, 20.7%; HPV18: 4/15, 26.7%). In the human genome,  
110 chromosome 17 was the most frequent breakpoint location for both HPV16 (14/87,  
111 16.1%) and HPV18 (5/15, 33.3%).

112 At the peptide level, among 12 detected human–HPV fusion peptides, 5 (41.7%)  
113 were derived from HPV16 and only 1 (8.3%) from HPV18 (Supplemental Figure 16C).  
114 HPV16-derived fusion peptides comprise five entries, of which four originate from the  
115 viral E1<sup>E4</sup> region and one originates from E2; on the human side, these five peptides  
116 map to four genes: LINC01696, FLJ46875, FGFR3, and MIR6870 (Supplemental Table  
117 7D). In contrast, only one HPV18-derived fusion peptide is observed, which originates  
118 from viral E2 and maps to an intronic breakpoint within the human gene VMP1 on  
119 chromosome 17 (Supplemental Table 7D).

120

121 **Supplemental Note 9. Analysis of the main results stratified by major**  
122 **histopathologic type squamous cell carcinoma and adenocarcinoma.**

### 123 ***Genomic profiling***

124 When stratified by histology, squamous cell carcinomas were mainly characterized by  
125 mutations in *PIK3CA* (26.5%, 30/113) and *KMT2C* (12.4%, 14/113), followed by  
126 *SYNE2* (8.0%, 9/113), *HUWE1* (7.1%, 8/113), *FBXW7* (7.1%, 8/113), *KMT2D* (6.2%,  
127 7/113), *NFE2L2* (5.3%, 6/113), *PTEN* (5.3%, 6/113), *EP300* (4.4%, 5/113) and *KLF5*  
128 (3.5%, 4/113). In adenocarcinomas, the most frequent mutations were observed in  
129 *PIK3CA* (16.7%, 2/12) and *KLF5* (16.7%, 2/12), followed by *HUWE1* (8.3%, 1/12) and

130 *EP300* (8.3%, 1/12) (Figure 1B).

131

132 ***Squamous cell carcinoma and adenocarcinoma distribution across molecular***  
133 ***subtypes***

134 We further observed a strong association between molecular subtype and squamous cell  
135 carcinoma and adenocarcinoma histology (Figure 3A). Of note, C4 consisted  
136 exclusively of squamous cell carcinoma (100%, 32/32) while C3 was predominantly  
137 squamous cell carcinoma (96.2%, 25/26). On the other hand, adenocarcinoma histology  
138 was mainly distributed in C1 (54.5%, 6/11) and C2 (36.4%, 4/11) subtypes.

139

140 ***Phosphoproteomic profiling***

141 Based on the kinase Z-score analysis, squamous cell carcinomas and adenocarcinomas  
142 exhibited both similarities and differences in their kinase activation patterns. Both  
143 cancer types shared upregulation of CLK1, AURKA, PRKDC, CDK1, and CDK2, as  
144 well as common downregulation of ROCK1, GSK3A, PRKG2, PDHK3, and ADRBK1.  
145 However, squamous cell carcinomas were mainly characterized by upregulation of  
146 HIPK family members, NEK2, and CHEK1, along with downregulation of CDK5,  
147 ROCK2, PRKG1, DAPK1, and LIMK2 (Supplemental Figure 19A). In contrast,  
148 adenocarcinomas showed major upregulation of MAPK3 and CDC7 (Supplemental  
149 Figure 19B). These differences likely suggested pathology-specific regulatory  
150 mechanisms in kinase signaling networks.

151

152 ***The distribution of ecDNA across histopathologic type***

153 Based on WGS data and the AmpliconArchitect algorithm, the prevalence of ecDNA  
154 was comparable between squamous cell carcinoma (38.9%, 44/113) and  
155 adenocarcinoma (30.8%, 4/13) (Supplemental Figure 19C). In squamous cell  
156 carcinoma samples with ecDNA, hybrid ecDNA alone was the most common type (29  
157 samples, 25.7%), followed by samples containing both hybrid and chromosome ecDNA  
158 (10 samples, 8.8%), and chromosome ecDNA alone (5 samples, 4.4%) (Supplemental  
159 Figure 19D). Similarly, in adenocarcinoma samples with ecDNA, hybrid ecDNA alone  
160 accounted for 2 samples (15.4%), while both hybrid and chromosome ecDNA together  
161 represented 1 sample (7.7%), and chromosome ecDNA alone represented 1 sample  
162 (7.7%) (Supplemental Figure 19E).

163

164 ***HPV integration patterns across histopathologic type***

165 Among the 662 genomic HPV integration events, 604 integration events were detected  
166 in squamous cell carcinomas (Supplemental Figure 19F left) and 46 integration events  
167 were detected in adenocarcinomas (Supplemental Figure 19F right). For squamous cell  
168 carcinomas, the majority of integration events originated in the HPV E1 region  
169 (228/604, 37.7%), followed by L2 (118/604, 19.5%), while the integration events  
170 mainly originated in L1 (12/46, 26.1%) and L2 (10/46, 21.7%) for adenocarcinomas.  
171 For the human genome, squamous cell carcinomas exhibited a broad distribution of  
172 breakpoints, with the higher frequencies observed on chromosomes 14 (59/604, 9.8%),  
173 1 (54/604, 8.9%), and 3 (53/604, 8.8%). Adenocarcinoma breakpoints showed a more

174 concentrated pattern, predominantly on chromosome 4 (24/46, 52.2%), followed by  
175 chromosomes 8 (5/46, 10.9%) and 2 (4/46, 8.7%). In parallel, RNA-sequencing (RNA-  
176 seq) identified 126 human-viral fusion transcripts in squamous cell carcinomas  
177 (Supplemental Figure 19G left) and 12 human-viral fusion transcripts in  
178 adenocarcinomas (Supplemental Figure 19G right). Mapping breakpoint positions  
179 along the viral genome revealed that breakpoints were enriched in early regions—most  
180 prominently E1 (squamous cell carcinomas, 79/126, 62.7%; adenocarcinomas, 9/12,  
181 75%). For human genome, the breakpoints in squamous cell carcinomas were mainly  
182 located on chromosomes 20 (16/126, 12.7%), 3 (14/126, 11.1%) and 6 (13/126, 10.3%),  
183 while those of adenocarcinomas were mainly in chromosomes 17 (6/12, 50%) and 4  
184 (4/12, 33.3%). The detailed HPV integration sites were displayed in the Circos plots of  
185 Supplemental Figure 19, F and G.

186

## 187 **References**

- 188 1. Alexandrov LB, et al. Signatures of mutational processes in human cancer. *Nature*.  
189 2013;500(7463):415-21.
- 190 2. Cancer Genome Atlas Research N, et al. Integrated genomic and molecular  
191 characterization of cervical cancer. *Nature*. 2017;543(7645):378-84.
- 192 3. Nelson BE, et al. Leveraging TROP2 Antibody-Drug Conjugates in Solid Tumors.  
193 *Annu Rev Med*. 2024;75:31-48.
- 194 4. Dequeker BJH, et al. MCM complexes are barriers that restrict cohesin-mediated  
195 loop extrusion. *Nature*. 2022;606(7912):197-203.

- 196 5. Zhou X, et al. MCM2 promotes the stemness and sorafenib resistance of  
197 hepatocellular carcinoma cells via hippo signaling. *Cell Death Discov.*  
198 2022;8(1):418.
- 199 6. Wang Y, et al. MCM6 is a critical transcriptional target of YAP to promote gastric  
200 tumorigenesis and serves as a therapeutic target. *Theranostics.*  
201 2022;12(15):6509-26.
- 202 7. Qu K, et al. MCM7 promotes cancer progression through cyclin D1-dependent  
203 signaling and serves as a prognostic marker for patients with hepatocellular  
204 carcinoma. *Cell Death Dis.* 2017;8(2):e2603.
- 205 8. Dongre A, et al. New insights into the mechanisms of epithelial-mesenchymal  
206 transition and implications for cancer. *Nat Rev Mol Cell Biol.* 2019;20(2):69-84.
- 207 9. Liis Uusküla-Reimand, et al. Untangling the roles of TOP2A and TOP2B in  
208 transcription and cancer. *Science advance.* 2022;8(44):eadd4920.
- 209 10. Gu L, et al. The Anticancer Activity of a First-in-class Small-molecule Targeting  
210 PCNA. *Clin Cancer Res.* 2018;24(23):6053-65.
- 211 11. Thorsson V, et al. The Immune Landscape of Cancer. *Immunity.* 2018;48(4):812-30  
212 e14.

## Supplemental Figures

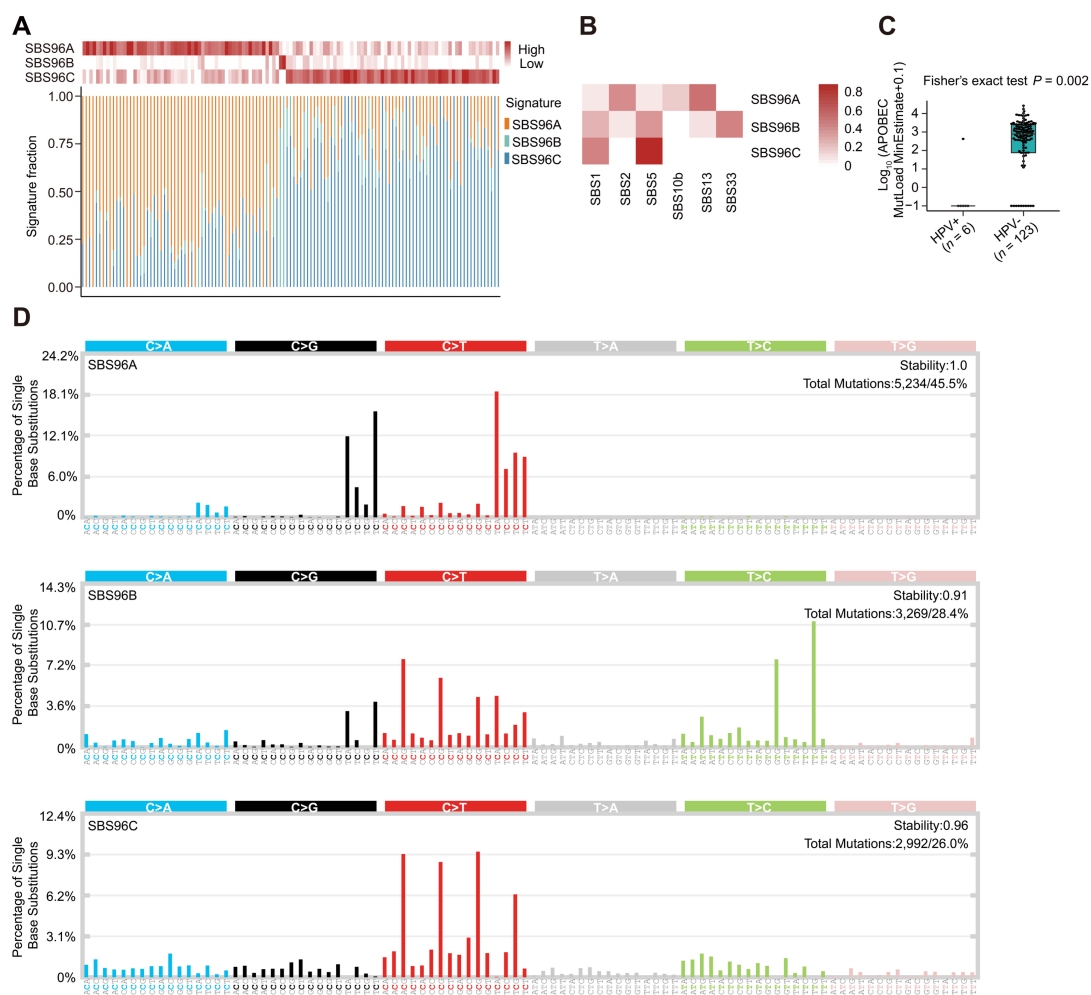

213 **Supplemental Figure 1. Mutation signatures in CC.** (A) Clustering of CC samples  
 214 based on relative proportions of SigProfiler-derived mutation signatures. (B) Heatmap  
 215 illustrating correlations between SigProfiler-derived mutation signatures and COSMIC  
 216 reference signatures. (C) Box plot showing the number of APOBEC-induced mutations  
 217 in HPV+ and HPV- tumors. Centers indicate the medians, the upper and lower  
 218 boundaries of the boxes indicate the 75th and 25th percentile, whiskers extend to 1.5×  
 219 interquartile range (IQR), Fisher's exact test,  $P = 0.002$ . (D) Trinucleotide motif  
 220 frequency plots and enriched mutational signatures identified in CC.

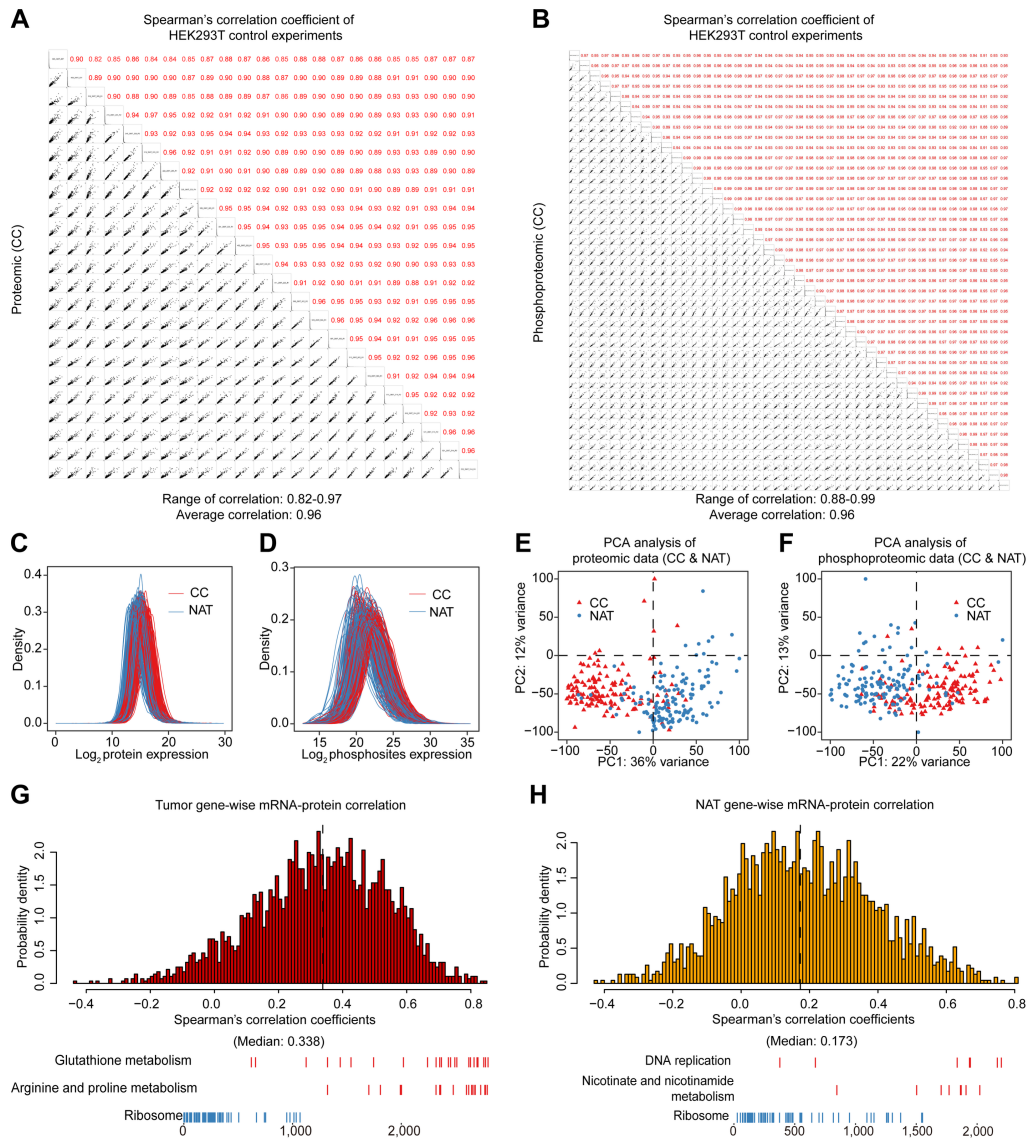

221 **Supplemental Figure 2. Comprehensive quality control and profiling of proteome**  
 222 **and phosphoproteome in CC and NAT samples. (A and B),** Quality control of the  
 223 MS platforms using tryptic digest of HEK293T cells. The top-right half of the panel  
 224 represents the pairwise Spearman's correlation coefficients of the samples, the bottom-  
 225 left half of the panel represents the pairwise scatterplots from the same comparison.  
 226 Proteome **(A)** and Phosphoproteome **(B)** of CC and NAT samples were profiled in  
 227 Beijing Proteome Research Center, Beijing Institute of Lifeomics, Beijing, China. **(C)**

228 and **D**), Distribution of protein and phosphoprotein abundances in CC (red) and NAT  
229 (blue) samples by density plot. (**E** and **F**), Principal component analysis of proteomic  
230 and phosphoproteomic data in 139 paired CC and NAT samples. (**G** and **H**), Histograms  
231 of gene-wise correlation between mRNA and protein abundances in CC (**G**) and NATs  
232 (**H**) (top). Red: pathways in which positively correlated genes were involved; blue:  
233 pathways in which negatively correlated genes were involved (bottom).

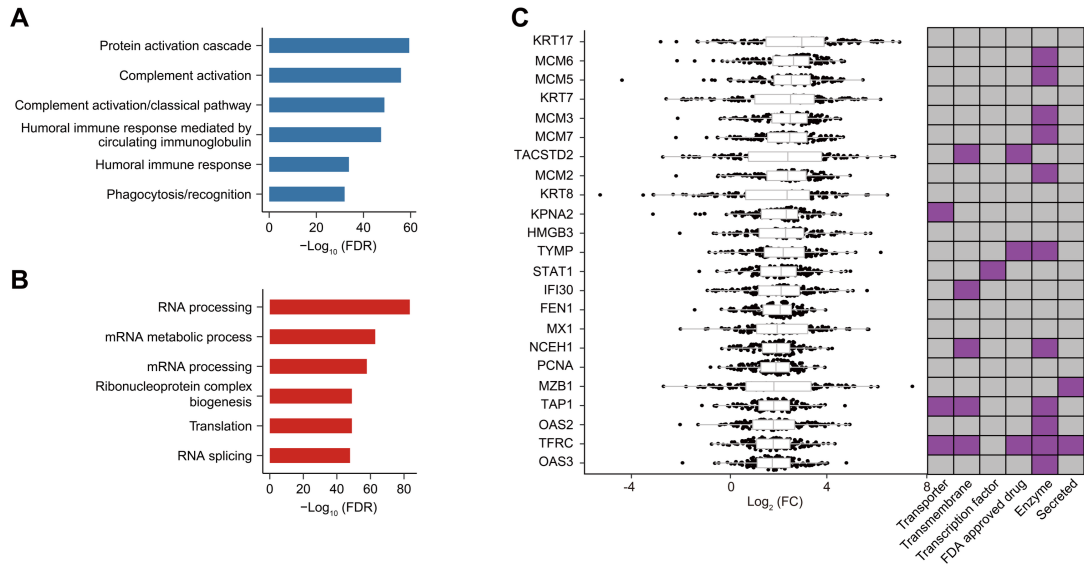

234

235 **Supplemental Figure 3. (A)** GO-BP terms enriched among downregulated proteins in

236 tumors. **(B)** GO-BP terms enriched among upregulated proteins in tumors. **(C)** Log<sub>2</sub>-

237 fold-change of proteins in tumors versus paired NATs (left) and corresponding clinical

238 annotations from the Human Protein Atlas (right).

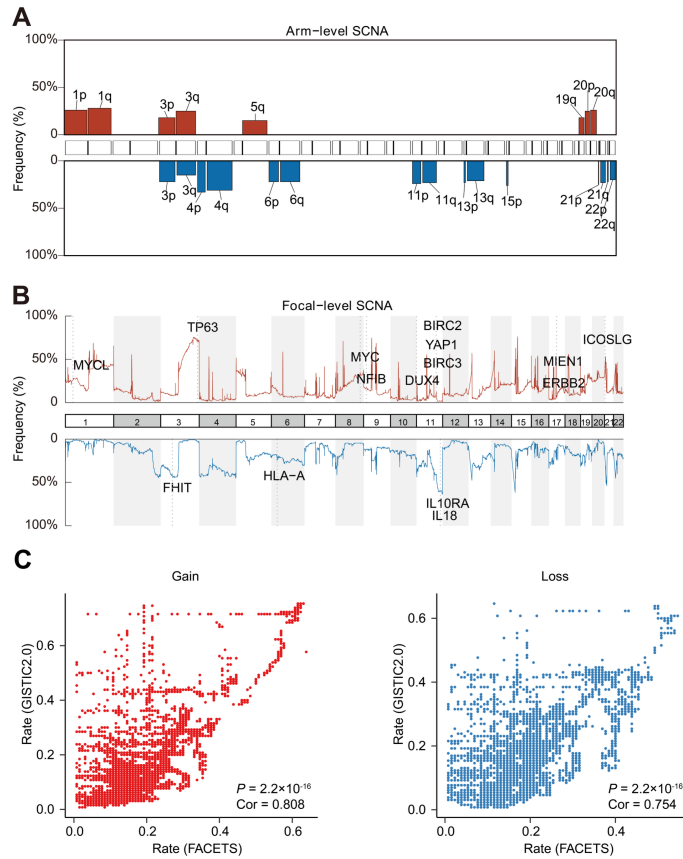

239 **Supplemental Figure 4. SCNAs in CC.** (A) Frequency of significant chromosome  
 240 arm-level SCNA events ( $Q < 0.25$ ). Red denotes gain and blue denotes loss. (B)  
 241 Frequency of focal-level SCNA events. Focal peaks with significant gains (red) and  
 242 losses (blue) ( $Q < 0.25$ ) are shown. Representative novel and reported focal regions and  
 243 genes encoded from these regions are labeled. (C) Concordance between SCNA  
 244 frequencies inferred by FACETS and GISTIC2.0 for gains (left) and losses (right),  
 245 Pearson's correlation.

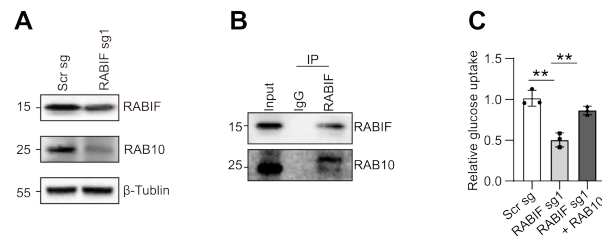

246 **Supplemental Figure 5. RABIF regulated glucose uptake via RAB10. (A)** Western  
 247 blot analysis of RAB10 expression in RABIF knockout SiHa cells.  $\beta$ -Tubulin served as  
 248 the loading control. **(B)** Immunoprecipitation assay assessing the interaction between  
 249 RABIF and RAB10 in SiHa cells. **(C)** Glucose uptake measured in SiHa cells. Data are  
 250 presented as means  $\pm$  SEM ( $n = 3$  replicates, two-sided Student's  $t$  test),  $*P < 0.05$ ,  $**P$   
 251  $< 0.01$ ,  $***P < 0.001$ .

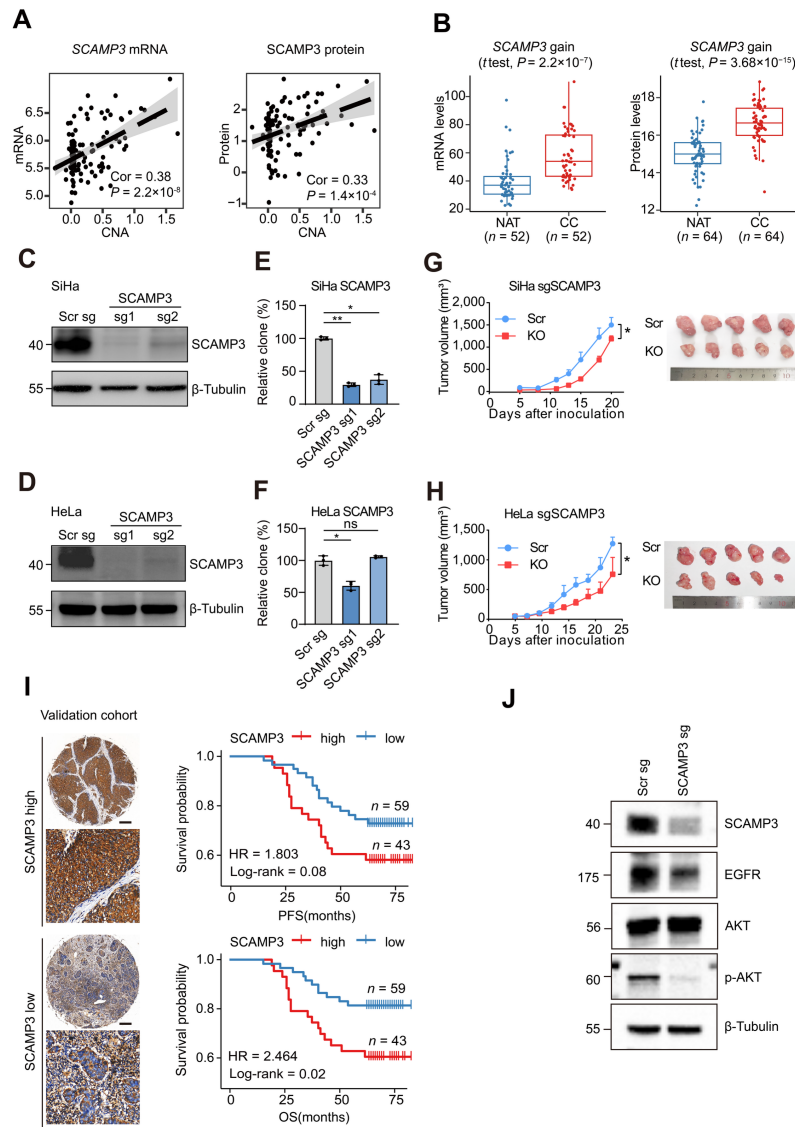

252 **Supplemental Figure 6. Impacts of *SCAMP3* gain on protein expression and tumor**  
 253 **growth. (A)** Spearman's correlation of *SCAMP3* CNA with mRNA (left) and protein  
 254 (right) abundances. **(B)** Box-and-whisker plot showing mRNA and protein expression  
 255 of *SCAMP3* in *SCAMP3* gain CCs and NATs. Centers indicate the medians, the upper  
 256 and lower boundaries of the boxes indicate the 75th and 25th percentile, whiskers  
 257 extend to 1.5 $\times$  interquartile range (IQR);  $n$  represents the number of samples. **(C and**  
 258 **D)** Western blot analysis of *SCAMP3* knockout efficiency in SiHa **(C)** and HeLa **(D)**

259 cells. **(E and F)** The quantification of *SCAMP3* knockout on colony formation abilities  
260 of SiHa **(E)** and HeLa **(F)** cells. Data represent mean  $\pm$  SEM ( $n = 3$  replicates, two-  
261 sided Student's  $t$  test.  $*P < 0.05$ ,  $**P < 0.01$ ,  $***P < 0.001$ ). **(G and H)** The impacts  
262 of *SCAMP3* knockout on tumor growth of SiHa **(G)** and HeLa **(H)** xenograft models.  
263 Data represent mean  $\pm$  SEM ( $n = 5$  mice per group, two-way analysis of variance),  $*P$   
264  $< 0.05$ ,  $**P < 0.01$ ,  $***P < 0.001$ . **(I)** Patients in an external cohort ( $n = 102$ ) were  
265 stratified by IHC staining of *SCAMP3*, representative images of *SCAMP3*-high and  
266 *SCAMP3*-low were present on the left. Scale bars, 200  $\mu\text{m}$ . Kaplan-Meier curves for  
267 PFS (top-right) and OS (bottom-right) of these patients are shown. Statistical analysis  
268 was performed using Log-rank tests. **(J)** Western blot analysis of EGFR expression and  
269 AKT phosphorylation following *SCAMP3* knockout in SiHa cells.

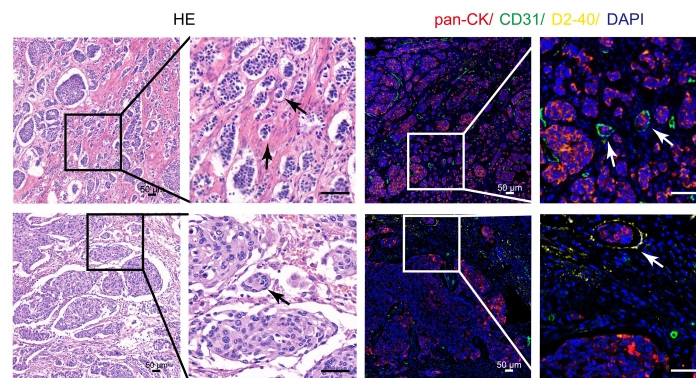

270 **Supplemental Figure 7. Representative multiplexed immunofluorescence images**

271 **showing LVSI in samples of C4.**

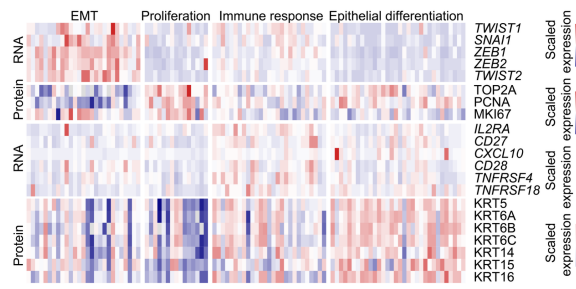

272 **Supplemental Figure 8. Heatmap displays mRNA expression levels of EMT-**  
 273 **inducing transcription factors and immune stimulators, along with protein**  
 274 **expression levels of proliferation markers and keratins across all 101 tumors.**

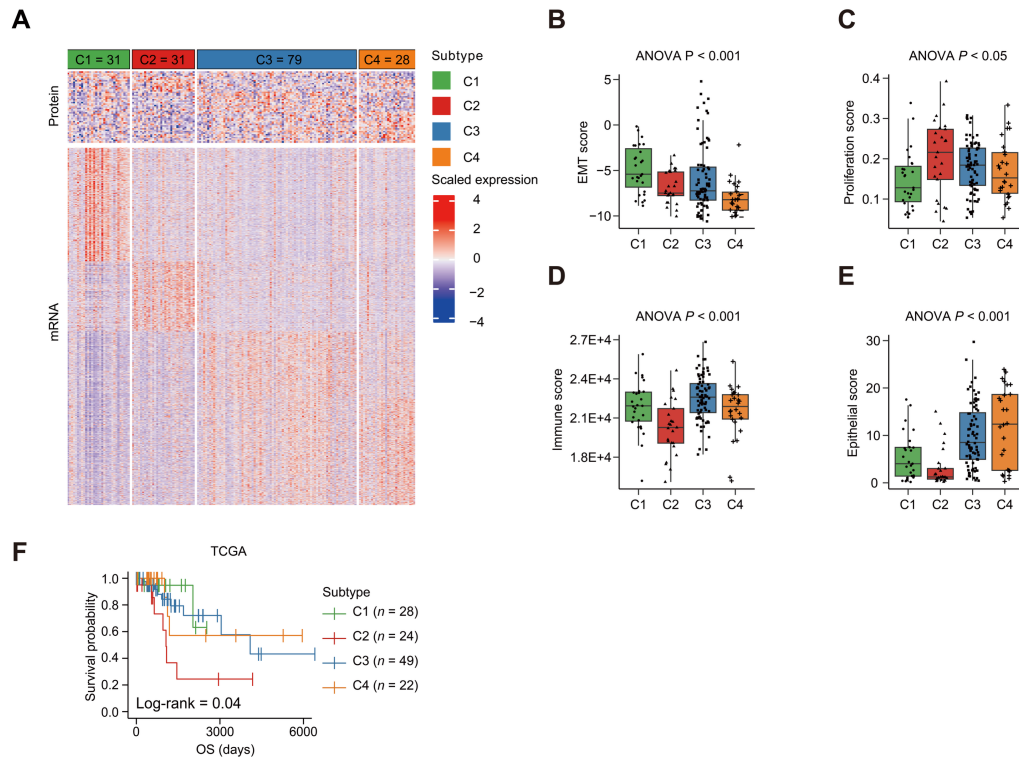

275 **Supplemental Figure 9. Subtyping validation using TCGA dataset. (A)** Heatmap of  
 276 mRNA and protein in TCGA samples across four subtypes. **(B–E)** EMT score **(B)**,  
 277 proliferation score **(C)**, immune score **(D)**, and epithelial score **(E)** are presented for all  
 278 TCGA samples (ANOVA test). The middle lines in the boxes are the median, the upper  
 279 and lower boundaries of the boxes are the first and third quartiles and the whiskers  
 280 extend to  $1.5\times$  the interquartile range of the lower and the upper quartiles. **(F)** Kaplan-  
 281 Meier curves comparing OS across all TCGA samples (Log-rank tests),  $n$  represents the  
 282 number of samples.

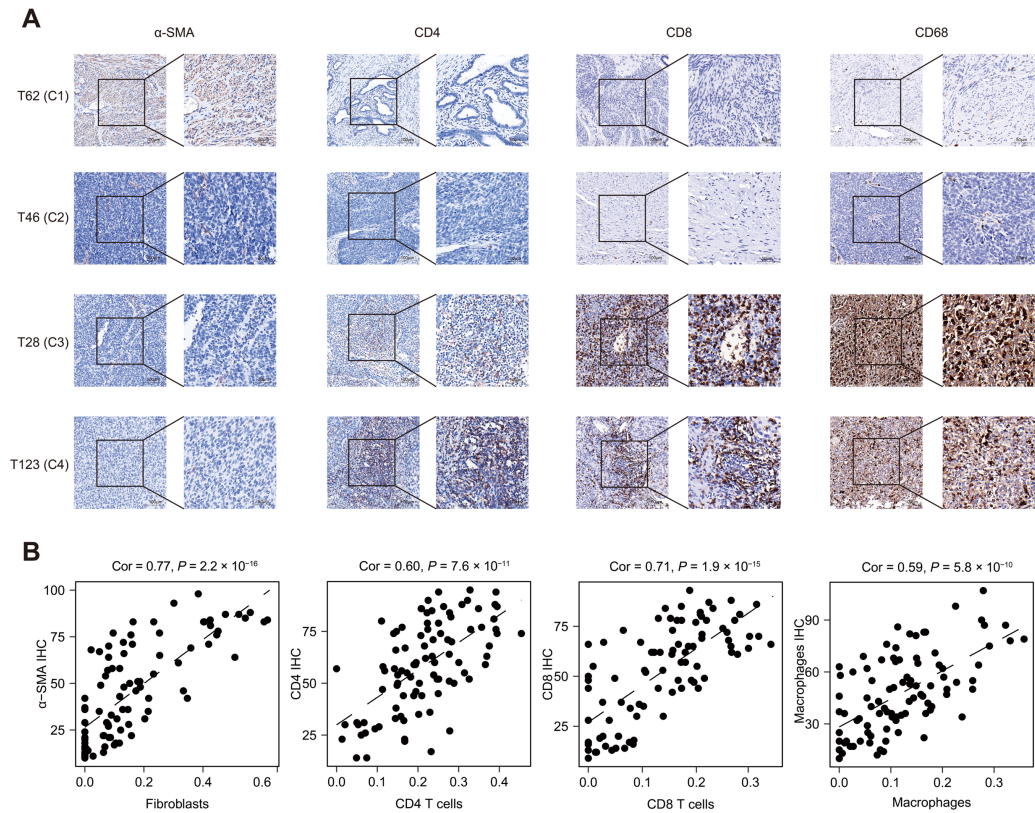

283

284 **Supplemental Figure 10. Validation of fibroblastic and lymphocytic infiltrates by**

285 **IHC. (A)** IHC staining images of fibroblasts and immune cell markers for 4 tumor

286 samples. **(B)** Correlation between IHC scores of immune-related markers (y axis) and

287 the percentages of the corresponding cell type (x axis) estimated by xCell in 93 tumor

288 samples,  $Cor > 0.55, P < 0.05$ . The correlations were assessed using Spearman's rank-

289 order correlation analysis.

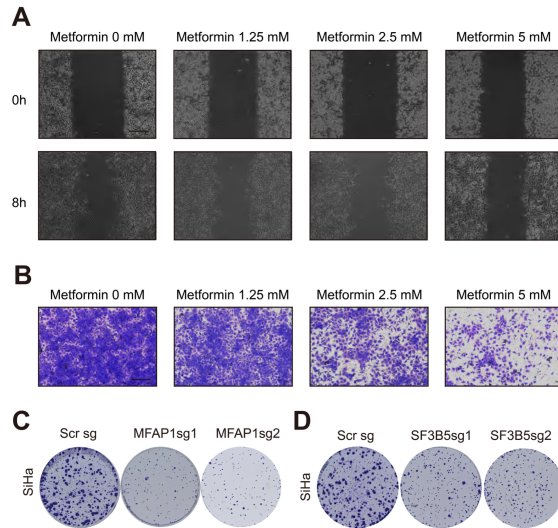

290 **Supplemental Figure 11.** (A) Representative images of transwell migration assays in  
 291 S12 cells treated with Metformin ( $n = 3$  biological replicates). Scale bar, 200  $\mu\text{m}$ . (B)  
 292 Representative images of wound healing assays in S12 cells, measured at 0 h and 8 h  
 293 after injury ( $n = 3$  biological replicates). Scale bar, 200  $\mu\text{m}$ . (C and D) The impacts  
 294 of MFAP1 (C) and SF3B5 (D) knockout on colony formation in SiHa cells.

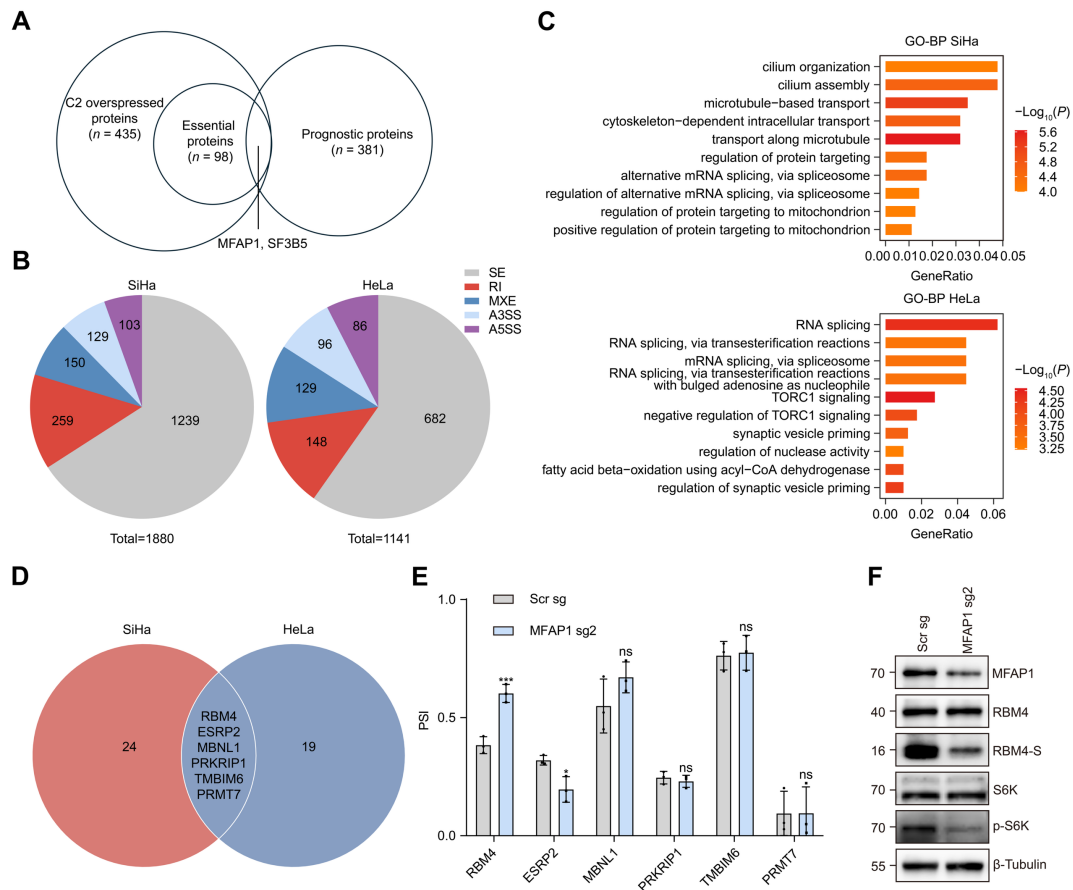

295 **Supplemental Figure 12. Profiles and validations of MFAP1-affected AS events in**  
 296 **CC cells. (A)** Number of proteins classified as C2 special, essential, or prognostic alone,  
 297 or in combination, with MFAP1 and SF3B5 shared across all three categories. **(B)**  
 298 MFAP1-affected alternative splicing (AS) events in SiHa (left) and HeLa (right) cell  
 299 lines. The AS events are classified into 5 categories: skipped exon (SE), retained intron  
 300 (RI), mutually-exclusive exon (MXE), alternative 3'splice site (A3SS), alternative  
 301 5'splice site (A5SS). **(C)** GO-BP terms enriched among AS genes in SiHa and HeLa  
 302 cell lines. **(D)** Overlapping AS targets enriched in RNA splicing between SiHa and  
 303 HeLa cell lines. **(E)** RT-PCR validation of the six overlapping AS targets. ImageJ  
 304 software was used to quantify the gray intensity of the DNA gel band and PSI was  
 305 calculated as splice\_in / (splice\_in + splice\_out) (n = 3 replicates, two-sided Student's

306 *t* test), \**P* < 0.05, \*\**P* < 0.01, \*\*\**P* < 0.001. (F) Western blot analysis of MFAP1,  
307 RBM4, RBM4-S, S6K and p-S6K in SiHa cells.

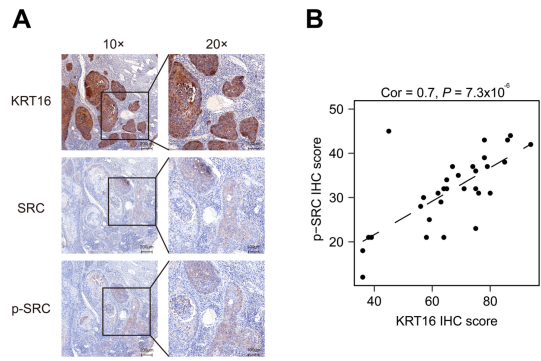

308 **Supplemental Figure 13. Correlation between KRT16 and p-Src in C4 subtype**  
 309 **samples. (A) Representative IHC staining of KRT16, Src and p-Src. (B) Correlation**  
 310 **between IHC scores of p-Src (y axis) and KRT16 (x axis). Cor = 0.64;  $P = 7.3 \times 10^{-06}$ .**

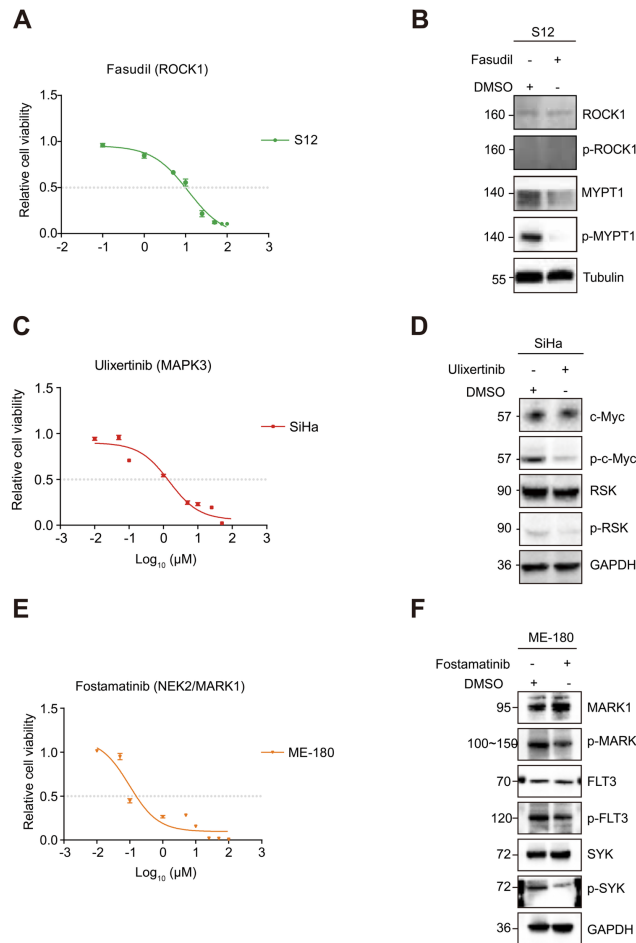

311 **Supplemental Figure 14. Validation of kinase inhibitor effects downstream**  
 312 **signaling.** (A) Relative viability of SiHa cells treated with Ulixertinib for 72h. (B)  
 313 Western blot analysis of the changes in C-MYC and RSK phosphorylation in SiHa cells  
 314 treated with Ulixertinib for 24h. GAPDH served as a loading control. (C) Relative  
 315 viability of ME-180 cells treated with Fostamatinib for 72h. (D) Western blot analysis  
 316 of the changes in MARK and FLT3 phosphorylation in ME-180 cells treated with  
 317 Fostamatinib for 24h. GAPDH served as a loading control.

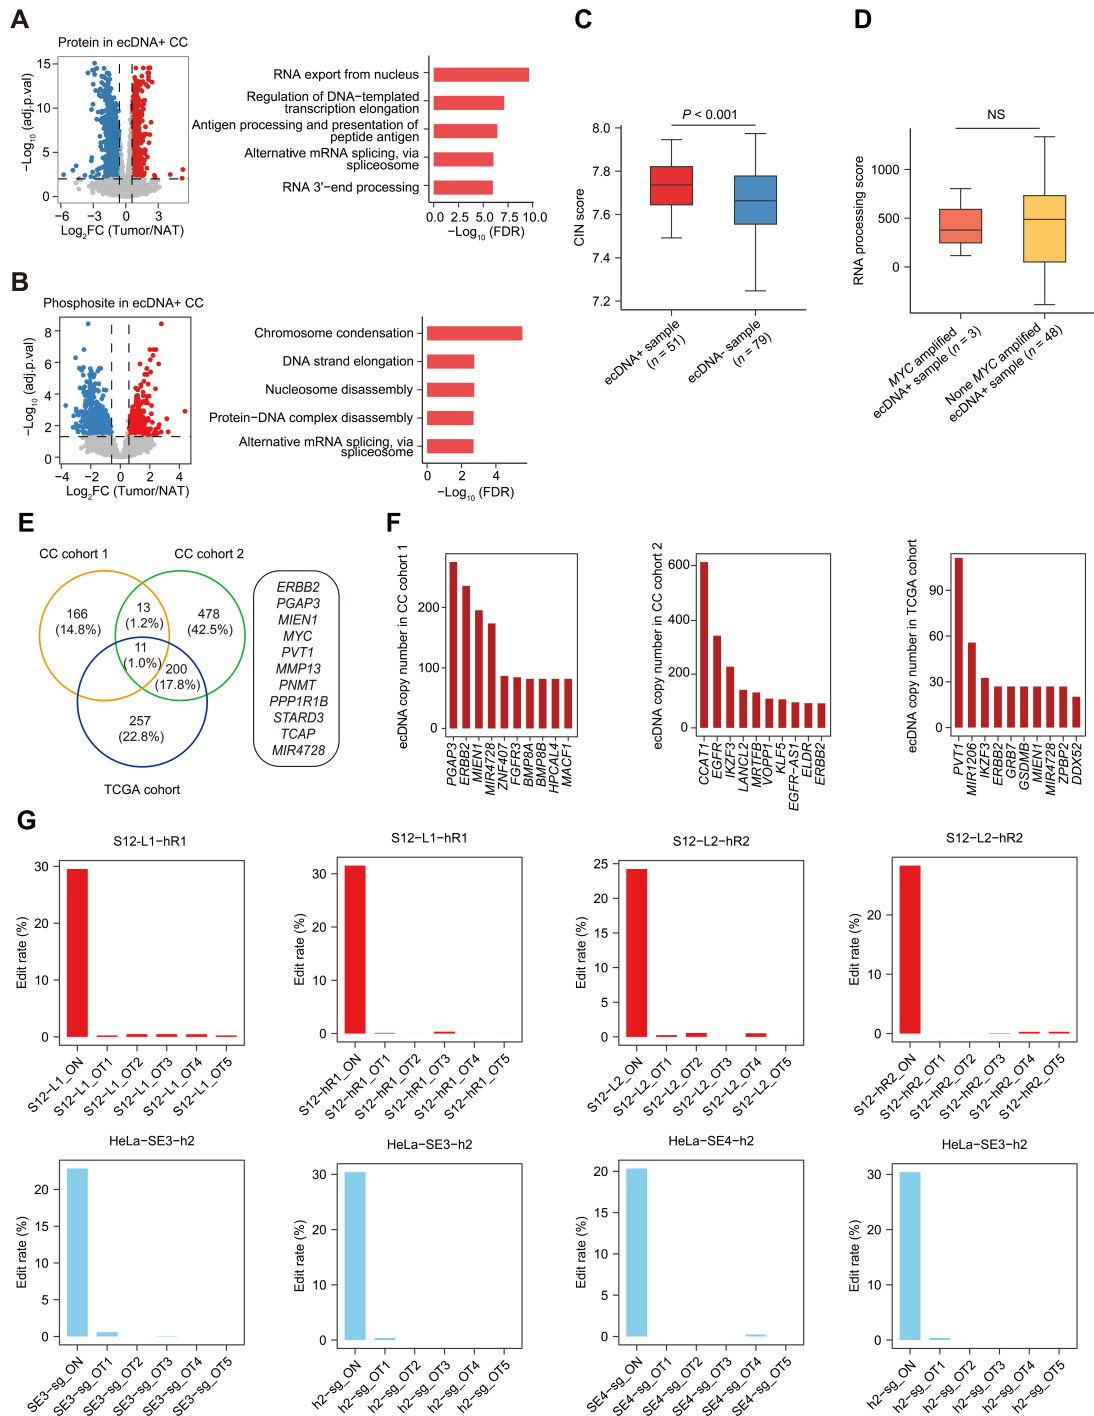

318 **Supplemental Figure 15. ecDNA landscape of CC cohorts.** (A) Volcano plot  
 319 depicting proteins differentially expressed in tumors and NATs of ecDNA+ samples  
 320 (BH adjusted  $P$  value  $< 0.01$ , fold-change  $> 1.5$ , modified  $t$  test) (left). Enriched GO  
 321 terms for the increased proteins in tumors (right). (B) Volcano plot illustrating

322 differentially expressed phosphosites in tumors and the paired NATs of ecDNA+  
323 samples (BH adjusted  $P$  value  $< 0.05$ , fold-change  $> 1.5$ , modified  $t$  test) (left). Enriched  
324 GO terms for the corresponding proteins of increased phosphosites in tumors (right).  
325 (C) Box plot showing the differences in CIN scores between ecDNA+ and ecDNA-  
326 samples. (D) Box plot showing the differences in RNA processing scores between *MYC*  
327 amplified ecDNA+ samples and none *MYC* amplified ecDNA+ samples. (E) Venn plot  
328 illustrating shared and unique ecDNA-associated genes across the three cohorts. (F)  
329 Gene-wise ecDNA copy number distributions in CC cohort 1, CC cohort 2 and the  
330 TCGA cohort. (G) On-target and off-target editing rates in HeLa and S12 cell lines.

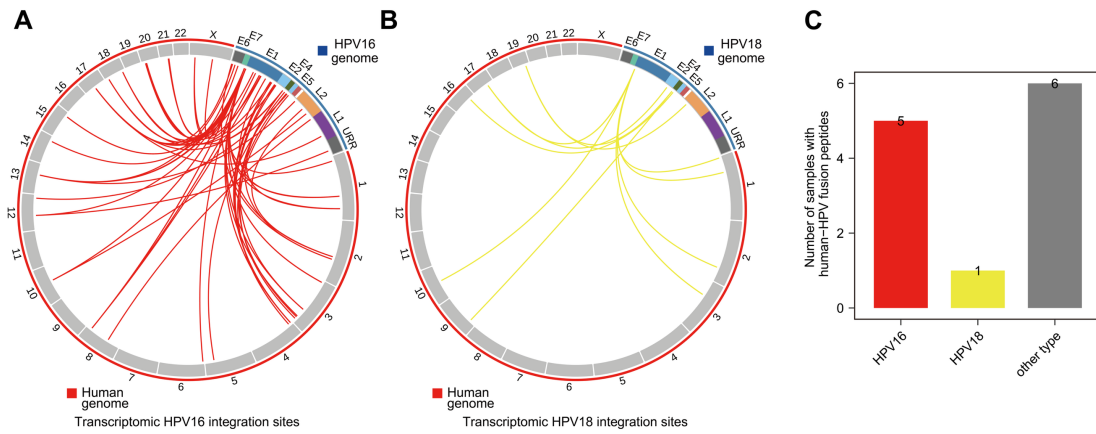

331 **Supplemental Figure 16. Human–HPV fusion transcripts and fusion peptides,**  
 332 **stratified by HPV type. (A–B) Joint Circos plot showing human-HPV fusion transcript**  
 333 **breakpoints from the HPV16 genome (A) and HPV18 genome (B) to the human**  
 334 **genome. (C) Distribution of HPV type in human-HPV fusion peptides.**

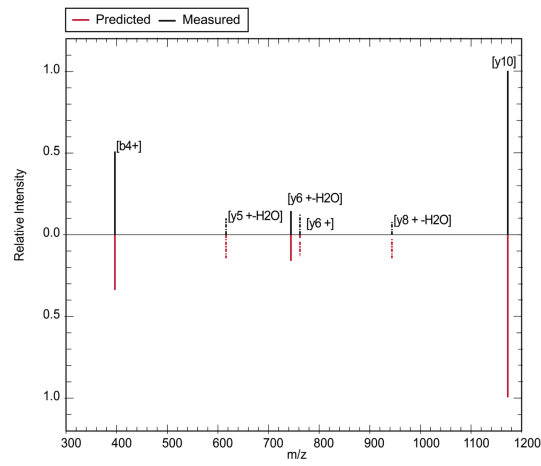

335 Supplemental Figure 17. The predicted spectrum and measured spectrum  
336 of[Acetyl(ProteinNterm)]ADPAASGSYPNRSGLQNPSLQTTRTR.3 in sample  
337 T115.



340 and detected fusion peptides of peptides No. 3–6



341 **Supplemental Figure 18. Detailed information for the human-viral fusion peptides.**

342 Genomic breakpoints, ORF of elongated RNA fusion reads, predicted fusion peptides

343 and detected fusion peptides of peptides No. 7–8, 10–12.

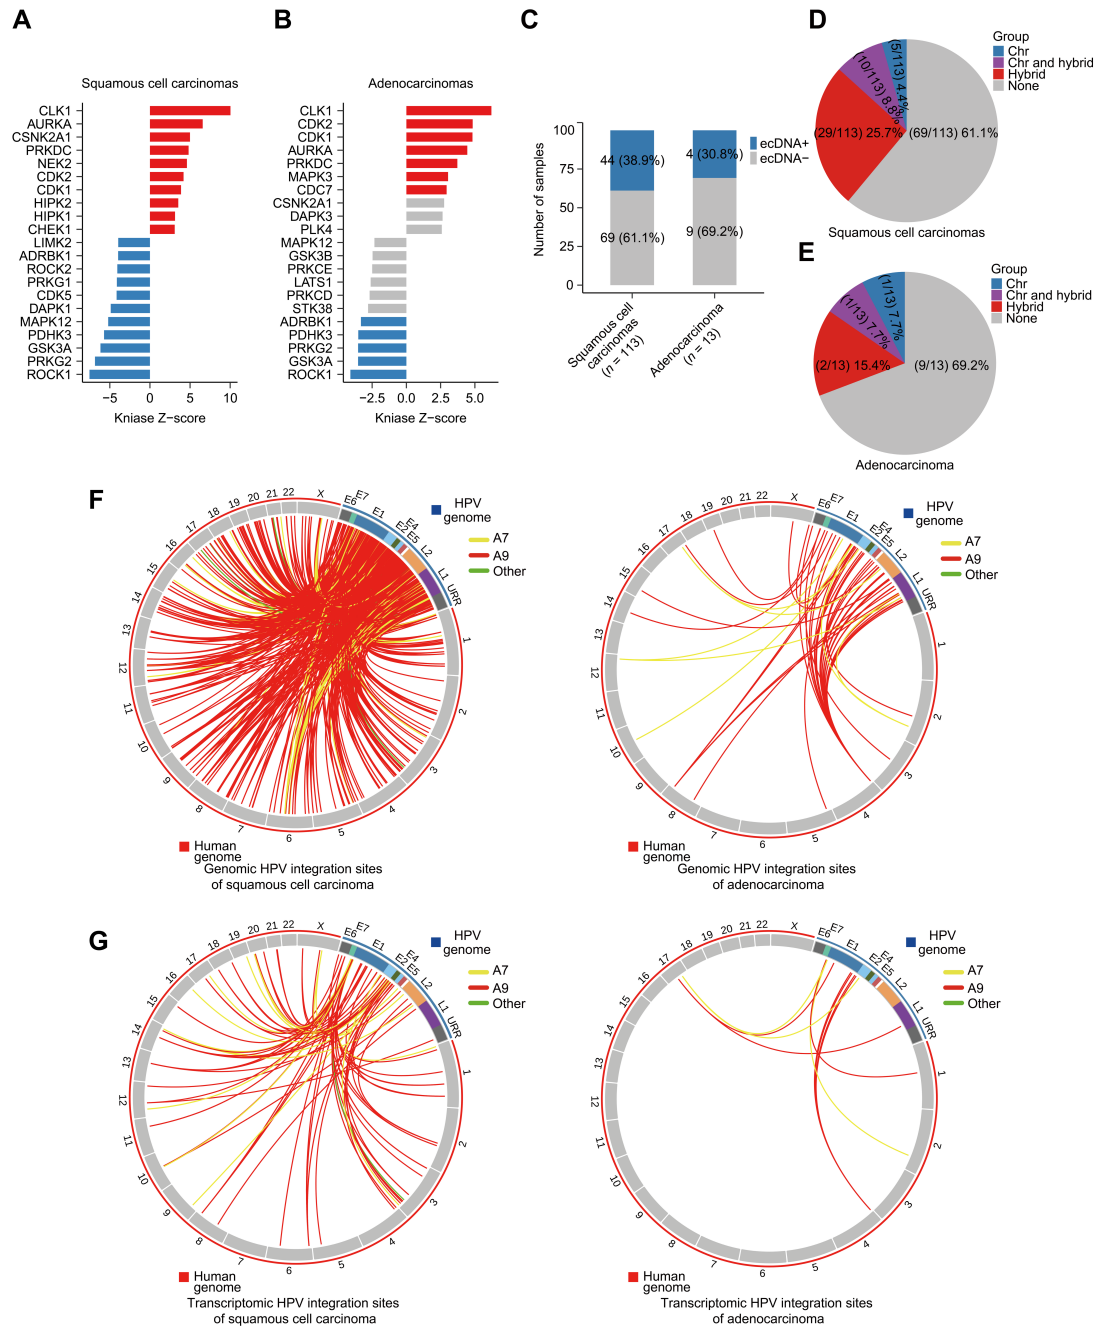

344 **Supplemental Figure 19. Analysis of the main results stratified by major**  
 345 **histopathologic type squamous cell carcinoma and adenocarcinoma. (A–B)**  
 346 Evaluation of kinase activities by KSEA in squamous cell carcinomas (A) and  
 347 adenocarcinoma (B). The distribution of whole ecDNA (C), hybrid ecDNA and  
 348 chromosome ecDNA in squamous cell carcinomas (D) and adenocarcinomas (E). Joint  
 349 Circos plot of HPV genes in genomic HPV integration sites (F) and transcriptomic HPV

350 integration sites (G).
